# Supplementary material for: Analysis on The Current Situation of Geography Teaching Research in Middle School -Taking China as An Example
Source: Research Square preprint supplement (doi:10.21203/rs.3.rs-1460565/v1), 2022-03-29
Supplement: Supplementary file 1 [file 4853813ebe66a891f015946c.docx]

**Schedule 1**

| Order number | Organization name | Number of published articles | Nature of location |
| --- | --- | --- | --- |
| 1 | Jilin Normal University | 33 | Urban |
| 2 | Shaanxi Normal University | 29 | Urban |
| 3 | China West Normal University | 28 | Urban |
| 4 | Central China Normal University | 23 | Urban |
| 5 | Fujian Normal University | 19 | Urban |
| 6 | Hebei Normal University | 17 | Urban |
| 7 | East China Normal University | 16 | Urban |
| 8 | Hunan Normal University | 15 | Urban |
| 9 | Nanjing Normal University | 14 | Urban |
| 10 | Yunnan Normal University | 14 | Urban |
| 11 | Anhui Normal University | 11 | Urban |
| 12 | Henan University | 10 | Urban |
| 13 | Inner Mongolia Normal University | 9 | Urban |
| 14 | Liaocheng University | 9 | Urban |
| 15 | Xinyang Normal University | 8 | Urban |
| 16 | Guangxi Normal University | 8 | Urban |
| 17 | Nantong University | 7 | Urban |
| 18 | Beijing Normal University | 7 | Urban |
| 19 | Northeast Normal University | 6 | Urban |
| 20 | Southwest University | 5 | Urban |
| 21 | Chongqing Normal University | 5 | Urban |
| 22 | SinoMaps Press | 5 | Urban |
| 23 | The Beijing Institute of Education | 5 | Urban |
| 24 | Qinghai Normal University | 5 | Urban |
| 25 | High School Affiliated to Nanjing Normal University | 4 | Urban |
| 26 | Nanchang Normal College | 4 | Urban |
| 27 | Jiangsu Yancheng City junior middle school | 4 | Urban |
| 28 | Tianjin Normal University | 4 | Urban |
| 29 | Huangshan Road branch of Xincheng junior middle school affiliated to Nanjing Normal University | 4 | Urban |
| 30 | The first experimental middle school affiliated to Sichuan Normal University | 4 | Urban |
| 31 | Jiangsu Baoying Huachuan senior middle school | 4 | County town |
| 32 | Northwest Normal University | 3 | Urban |
| 33 | The sixth middle school in Qingshui County, Gansu Province | 3 | County town |
| 34 | Lanzhou Institute of Education | 3 | Urban |
| 35 | Sichuan Institute of Educational Sciences | 3 | Urban |
| 36 | Xinxiang College | 3 | Urban |
| 37 | Guangzu middle school, Pingshan District, Shenzhen City, Guangdong Province | 3 | Urban |
| 38 | Beijiao Senior Middle School Affiliated to Shanghai University of Finance and Economics | 3 | Urban |
| 39 | Institute of curriculum and teaching, East China Normal University | 3 | Urban |
| 40 | Ji'an Qian'an No. 7 middle school | 3 | County town |
| 41 | Shenzhen Institute of Education | 3 | Urban |
| 42 | Teaching and Research Office of Shanghai Municipal Commission of Education | 3 | Urban |
| 43 | Hohhot 18th middle school | 3 | Urban |
| 44 | Middle school affiliated to Hunan Normal University | 3 | Urban |
| 45 | Anshan No. 2 middle school | 3 | Urban |
| 46 | Shanghai Pudong Education Development Research Institute | 3 | Urban |
| 47 | Shanxi Datong No. 3 middle school | 3 | Urban |
| 48 | Jiangxi Normal University | 3 | Urban |
| 49 | Hainan Normal University | 3 | Urban |
| 50 | Yunnan Chengjiang No.1 Middle School | 3 | County town |
| 51 | Middle school affiliated to Nanchang Normal University | 3 | Urban |
| 52 | Institute of Geographical Sciences and resources, Chinese Academy of Sciences | 3 | Urban |
| 53 | Neiqiu No. 2 middle school | 3 | County town |
| 54 | Qidong Middle School of Jiangsu Province | 3 | County town |
| 55 | Yulin No.11 middle school | 3 | Urban |
| 56 | Jiangsu Taicang senior middle school | 2 | County town |
| 57 | Rugao No.2 Middle School | 2 | County town |
| 58 | Shenzhen Buji middle school, Guangdong Province | 2 | Urban |
| 59 | Shangrao middle school | 2 | Urban |
| 60 | Zhangzhou No. 5 middle school, Fujian Province | 2 | Urban |
| 61 | Xinhua Yunshan junior middle school, Huadu District, Guangzhou City, Guangdong Province | 2 | Urban |
| 62 | Jiangsu Pingchao senior high school | 2 | Urban |
| 63 | Liulin middle school, Zhuoni County, Gansu Province | 2 | County town |
| 64 | Zijing middle school, Zhuanglang County, Pingliang City, Gansu Province | 2 | County town |
| 65 | Neijiang normal university | 2 | Urban |
| 66 | Yi'an normal school | 2 | County town |
| 67 | Shihezi University | 2 | Urban |
| 68 | Anhui Wuhe No.1 Middle School | 2 | County town |
| 69 | Jiangsu Siyang middle school | 2 | County town |
| 70 | Liaoheyuan town middle school, Dongliao County, Jilin Province | 2 | Villages and towns |
| 71 | Dunhuang middle school, Dunhuang City, Gansu Province | 2 | County town |
| 72 | Wujiang middle school, Suzhou City, Jiangsu Province | 2 | Urban |
| 73 | Hunan University of Arts and Sciences | 2 | Urban |
| 74 | Jiangsu Binhai middle school | 2 | County town |
| 75 | People's Education Press | 2 | Urban |
| 76 | Guocheng agricultural middle school, Huining County, Gansu Province | 2 | Villages and towns |
| 77 | Shenzhen No. 3 senior middle school, Guangdong Province | 2 | Urban |
| 78 | Putian No. 12 middle school, Fujian Province | 2 | Urban |
| 79 | Baotou Teachers' College | 2 | Urban |
| 80 | Junior middle school in zhoujiashan Town, Mianxian County | 2 | Villages and towns |
| 81 | Shanghai Normal University | 2 | Urban |
| 82 | Jiangsu Xinghua teacher training school | 2 | County town |
| 83 | Shanghai Minhang High School | 2 | Urban |
| 84 | The first complete middle school in Shuangjiang County, Lincang City, Yunnan Province | 2 | County town |
| 85 | Shanghai Gezhi High School | 2 | Urban |
| 86 | Ji'an No.3 Middle School | 2 | Urban |
| 87 | No. 1 middle school, Chixi District, Changbai Mountain protection and Development Zone, Jilin Province | 2 | Urban |
| 88 | Branch of Hengshui University | 2 | Urban |
| 89 | The first middle school in Minqin County, Gansu Province | 2 | County town |
| 90 | Wuhai No. 22 middle school | 2 | Urban |
| 91 | Hesheng junior middle school, Ning County, Qingyang City, Gansu Province | 2 | County town |
| 92 | Taizhou Xinning middle school | 2 | Urban |
| 93 | Shanghai Taopu middle school | 2 | Urban |
| 94 | Zibo Linzi District zhutai town Gaoyang middle school | 2 | Villages and towns |
| 95 | Zibo Gaoqing No.1 Middle School | 2 | County town |
| 96 | Yuqing Baini middle school | 2 | County town |
| 97 | Beijing No.4 Middle School | 2 | Urban |
| 98 | Chengqiao senior middle school, Liuhe District, Nanjing, Jiangsu Province | 2 | Villages and towns |
| 99 | Harbin Normal University | 2 | Urban |
| 100 | Chongqing Kaixian middle school | 2 | County town |
